# Supplementary material for: Challenges of the next decade for the Asia Pacific region: 2010 International Conference in Bioinformatics (InCoB 2010)
Source: PubMed Central journal article supplement (PMC3005919; doi:10.1186/1471-2164-11-s4-s1), 2010-12-02
Supplement: 1471-2164-11-S4-S1-S2.pdf [file 1471-2164-11-S4-S1-S2.pdf]

**Challenges of the next decade for the Asia Pacific region: 2010 International Conference in Bioinformatics (InCoB 2010)**

Shoba Ranganathan, Christian Schönbach, Kenta Nakai and Tin Wee Tan

**Additional File 2: InCoB2010 Sponsors**

**Platinum Sponsors**

1. Protein Databank Japan(PDBj)
2. Biology Research Center (CBRC), National Institute of Advanced Industrial Science and Technology, Japan (AIST)

**Gold Sponsor**

1. GenoCon (RIKEN BASE (Bioinformatics And Systems Engineering division))

**Silver Sponsors**

1. Illumina®
2. MITSUI KNOWLEDGE INDUSTRY CO., LTD.
3. MITSUBISHI SPACE SOFTWARE CO., LTD.
4. Logo Sponsors
5. IMGT®, the international ImMunoGeneTics information system®
6. Hitachi, Ltd.
7. Material Sponsors
8. BioMed Central Ltd.
9. Kyushu Institute of Technology.
